## RESEARCH ARTICLE

# A comparative study of the efficacy of NAXOZOL compared to celecoxib in patients with osteoarthritis

Moon Soo Park<sup>1</sup>, Chang-Nam Kang<sup>2</sup>, Woo-Suk Lee<sup>3</sup>, Ho-Joong Kim<sup>4</sup>, Sahnghoon Lee<sup>5</sup>, Jin Hwan Kim<sup>6</sup>, Sang-Jin Shin<sup>7</sup>, Seong-Hwan Moon<sup>8\*</sup>

**1** Department of Orthopaedic Surgery, Medical College of Hallym University, Gyeonggi-do, Republic of Korea, **2** Department of Orthopedic Surgery, Hanyang University College of Medicine, Seoul, Republic of Korea, **3** Department of Orthopedic Surgery, Gangnam Severance Hospital, Seoul, Republic of Korea, **4** Spine Center and Department of Orthopaedic Surgery, Seoul National University Bundang Hospital, Seoul National University College of Medicine, Gyeonggi-do, Republic of Korea, **5** Department of Orthopaedic Surgery, Seoul National University, Seoul National University College of Medicine, Seoul, Republic of Korea, **6** Department of Orthopaedic Surgery, Ilsan Paik Hospital, Inje University College of Medicine, Gyeonggi-do, Republic of Korea, **7** Department of Orthopaedic Surgery, Mokdong Hospital, Ewha Womans University College of Medicine, Seoul, Republic of Korea, **8** Department of Orthopaedic Surgery, Yonsei University College of Medicine, Seoul, Republic of Korea

\* [SHMOON@yuhs.ac](mailto:SHMOON@yuhs.ac)

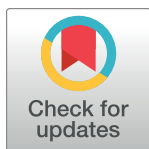

## OPEN ACCESS

**Citation:** Park MS, Kang C-N, Lee W-S, Kim H-J, Lee S, Kim JH, et al. (2020) A comparative study of the efficacy of NAXOZOL compared to celecoxib in patients with osteoarthritis. PLoS ONE 15(1): e0226184. <https://doi.org/10.1371/journal.pone.0226184>

**Editor:** Cristina Vassalle, Fondazione Toscana Gabriele Monasterio, ITALY

**Received:** February 20, 2019

**Accepted:** October 8, 2019

**Published:** January 27, 2020

**Copyright:** © 2020 Park et al. This is an open access article distributed under the terms of the [Creative Commons Attribution License](https://creativecommons.org/licenses/by/4.0/), which permits unrestricted use, distribution, and reproduction in any medium, provided the original author and source are credited.

**Data Availability Statement:** All relevant data are within the paper and its Supporting Information files.

**Funding:** This study was supported by a research fund from Hanmi Pharmaceutical Co., Ltd (grant number HM-IITNAX-001). NAXOZOL® (Naproxen, Esomeprazole strontium) was provided by Hanmi Pharmaceutical Co., Ltd. The funder provided support in the form of salaries for authors [MSP, CNK, WSL, HJK, SHL, JHK, SJS, SHM], but did not have any additional role in the study design, data

## Abstract

### Objective

Selective cyclooxygenase-2 inhibitors (celecoxib) can minimize the gastrointestinal complications related to non-steroidal anti-inflammatory drug (NSAID) use. NAXOZOL is a new combination formulation designed to provide sequential delivery of a non-enteric-coated, immediate-release esomeprazole strontium tetrahydrate 20 mg mantle followed by an enteric-coated naproxen 500 mg core. However, there have been no studies comparing NAXOZOL to celecoxib with respect to gastrointestinal tract protection and pain relief in patients with osteoarthritis. This study was undertaken to compare the effects of NAXOZOL and celecoxib with respect to gastrointestinal tract protection and pain relief in patients with osteoarthritis.

### Methods

The randomized enrolled patients were divided into two treatment groups: a NAXOZOL group and a celecoxib group. All participants received treatments (NAXOZOL, 500/20 mg (naproxen 500 mg, esomeprazole strontium tetrahydrate 20 mg) twice per day *versus* celecoxib, 200 mg daily) on a 1:1 allocation basis for 12 weeks. The primary outcome was the Leeds Dyspepsia Questionnaire (LDQ) score used for non-inferiority testing. Secondary outcome measures included the Gastrointestinal Symptom Rating Scale (GSRS) score, Visual Analogue Scale (VAS) score, European Quality of Life-5 dimensions (EQ-5D) scale and the EQ-5D Visual Analogue Scale (EQ VAS). Other outcome measures included the use of supplementary or rescue drugs, and the incidence of adverse events.

collection, and analysis, decision to publish, or preparation of the manuscript. The funder was not involved in any part of the trial implementation or data analysis. The specific roles of these authors are articulated in the 'author contributions' section.

**Competing interests:** This study was supported by a research fund from Hanmi Pharmaceutical Co., Ltd (grant number HM-IITNAX-001). NAXOZOL (Naproxen, Esomeprazole strontium) was provided by Hanmi Pharmaceutical Co., Ltd. The funder provided support in the form of salaries for authors [MSP, CNK, WSL, HJK, SHL, JHK, SJS, SHM]. NAXOZOL is a combination drug of naproxen and esomeprazole strontium ("esomezol" proved in FDA) as a product marketed in only Korea currently. NAXOZOL was patented in 2013 as it contains esomeprazole strontium developed in Hanmi pharmaceutical company. This does not alter our adherence to PLOS ONE policies on sharing data and materials.

## Results

The baseline-adjusted LDQ scores immediately after 12 weeks of treatment in NAXOZOL group were not inferior to those in celecoxib group. The overall change in the baseline-adjusted GRSR score, VAS score, EQ-5D, and EQ VAS was not different between the two groups. The usage of supplementary drugs and the drug-related incidence of adverse events were not different. However, the days to use rescue drug were longer in celecoxib group than in NAXOZOL group.

## Conclusion

NAXOZOL was not inferior to celecoxib in protecting the gastrointestinal tract and providing pain relief in patients with osteoarthritis.

## Introduction

Dyspepsia related to the use of a nonsteroidal anti-inflammatory drug (NSAID) is common, and occurs in about 25–30% of NSAID users [1, 2]. Efforts have been made to reduce the rate of gastrointestinal complications related to the use of NSAIDs. Selective cyclooxygenase-2 inhibitors (COX-2 inhibitors such as celecoxib) can minimize gastrointestinal complications related to the use of NSAIDs [3, 4]. In addition, dyspepsia can be relieved with proton pump inhibitors (PPIs), and PPIs are more effective at relieving dyspepsia than ranitidine and misoprostol [5, 6]. According to the guidelines of the American College of Gastroenterology, patients with a moderate risk of gastrointestinal bleeding are recommended to take PPIs whenever they take NSAIDs [7].

A combination of enteric-coated naproxen 500 mg and immediate-release esomeprazole magnesium 20 mg has been designed to provide sequential delivery of an NSAID and a PPI in a single tablet [8]. This combination formulation demonstrated comparable analgesic efficacy in the treatment of osteoarthritis over a 3-month period [9]. There was no difference in dyspepsia compared to selective COX-2 inhibitors [10], and the incidence of endoscopic gastric ulcers in patients at risk of NSAID-associated ulceration was significantly reduced over a 6-month observation period [11]. In patients at risk of upper gastrointestinal complications who required NSAID therapy, treatment for more than one year with this combination formulation was not associated with any safety issues or adverse effects in the upper gastrointestinal tract or the cardiovascular system [12].

NAXOZOL is the new combination formulation designed to provide sequential delivery of a non-enteric-coated, immediate-release esomeprazole strontium tetrahydrate 20 mg mantle followed by an enteric-coated naproxen 500 mg core [13–15]. However, there have been no studies comparing NAXOZOL to celecoxib with respect to gastrointestinal tract protection and pain relief in patients with osteoarthritis. Therefore, the purpose of this study was to compare the efficacies of NAXOZOL and celecoxib as to gastrointestinal tract protection and pain relief in patients with osteoarthritis.

## Material and methods

### Study design

This study was a prospective, double-blind, double-dummy, active-controlled, two-arm parallel, randomized controlled preliminary trial that was designed to compare the effects of

NAXOZOL (Hanmi Pharmaceutical Co., Ltd., Seoul, Republic of Korea) to celecoxib with respect to gastrointestinal tract protection and pain relief in individuals with osteoarthritis. The study was approved by the institutional review board of Severance Hospital, Yonsei University, College of Medicine, Seoul, Korea (IRB number: 4-2014-0906). All participants provided written informed consent before study enrollment.

The enrolled patients were divided into two treatment groups: a NAXOZOL group and a celecoxib group. All participants received treatments (NAXOZOL, 500/20 mg (naproxen 500 mg, esomeprazole strontium tetrahydrate 20 mg) twice per day *versus* celecoxib, 200 mg daily) on a 1:1 allocation basis for 12 weeks. The randomization was made by the permuted block randomization method. The permuted block size was 2 by the site. All treatment regimens were administered in a double-blind and double-dummy manner. Both investigator and subject were blinded to study group allocation. Hence, they were blinded as to whether the subject received the experimental drug or the control drug. The investigational products for this study (experimental drug: NAXOZOL tablet; control drug: celecoxib capsule) differed in color and packaging, so this study was a double-placebo study that used a placebo for the experimental drug that is equal in form, shape, and packaging to the experimental drug, and a different placebo for the comparator that is equal in form, shape, and packaging to the comparator, ensuring that the double-blinding of the investigator and subjects was maintained during the study period. Neither the investigator nor the subject could be aware of whether the experimental drug or the control drug was administered to the subject until the termination of the study. A follow-up period of 12 weeks was determined based on data obtained from previous studies on dyspepsia [16, 17]. This study is registered at ClinicalTrials.gov (number: NCT02355236). The authors confirm that all ongoing and related trials for this drug/intervention are registered.

### Eligibility criteria

The inclusion criteria were as follows: (1) age  $\geq$  50 years old, (2) symptomatic osteoarthritis diagnosed on radiographs, with a visual analog scale (VAS) score  $>$  4 for pain. Diagnosis of osteoarthritis was made based on history, clinical examination and radiographic changes [18]. The typical changes seen on radiographs were joint space narrowing, subchondral sclerosis), subchondral cyst formation, and osteophytes. The exclusion criteria were: any history of gastrointestinal ulcer including gastrointestinal bleeding, perforation, penetration, gastric outlet obstruction, or gastrointestinal cancer; gastroesophageal reflux; gastrointestinal infection with *Helicobacter*; a diagnosis of septic arthritis, rheumatic arthritis, gout, Paget's disease, acromegaly, or Ehlers Danlos Syndrome; any history of joint surgery for the osteoarthritis; pregnancy, or the possibility of pregnancy in women who did not agree to use proper contraception; heavy alcohol intake; allergy to NSAIDs or PPIs; severe liver disease (equal to or greater than Child-Pugh Class II); chronic kidney disease (creatinine clearance  $<$  30 mL/min); heart disease with a history of coronary artery bypass graft; uncontrolled hypertension; enrollment in other clinical trials within the prior 1 month; any concurrent serious medical condition such as sepsis or cancer that would cause disability or compromise the patients' general health status.

### Efficacy assessments

Baseline data collected by a blinded clinical research assistant included sex, birth date, height, weight, smoking status, status of alcohol drinking, and medication use. The primary outcome was the Leeds Dyspepsia Questionnaire (LDQ) score immediately after 12 weeks of treatment. The LDQ was based on a self-administered questionnaire that measured "gastrointestinal symptoms" [19]. It is a Likert scale that evaluates gastrointestinal symptoms including:

indigestion (pain in the upper abdomen), heartburn (burning sensation behind the sternum), a sensation of food stuck in the throat, regurgitation (an acid taste in the mouth from stomach contents), burping or belching, nausea, vomiting, and excessive fullness. Secondary outcome measures included the Gastrointestinal Symptom Rating Scale (GSRS) score, Visual Analogue Scale (VAS) score for osteoarthritis, European Quality of life-5 Dimensions (EQ-5D) scale, and EQ-5D Visual Analogue Scale (EQ VAS). The GSRS was based on a self-administered questionnaire with 15 questions measuring the “gastrointestinal symptoms of gastroesophageal reflux, functional dyspepsia and irritable bowel syndrome” [20]. The VAS for arthritic pain comprised a 10-cm line with “none” (0) on one end of the scale and “disabling pain” (10) on the other [21]. On the EQ-5D scale, scores range from 0 to 1, with 1 indicating perfect health [22]. The EQ VAS is the second part of the EQ-5D questionnaire, with instructions that state to mark the current health status on a 20-cm vertical scale, from 0 (“the worst health you can imagine”) to 100 (“the best health you can imagine”). The LDQ score, GSRS score, VAS score, EQ-5D scale, and EQ VAS were assessed at enrollment and at 12 weeks after treatment.

Other outcome measures included the use of supplementary or rescue drugs, and the incidence of adverse events. The patients that had severe dyspepsia during the study were provided the supplementary drug (almagate 500 mg) to alleviate their symptoms. The patients that had severe arthritis pain that was uncontrolled with our treatment regimens were provided the rescue drug (acetaminophen 650 mg) to alleviate their symptoms. The investigator monitored for adverse events during each visit for all participants. Adverse events were recorded in detail irrespective of causality or association with the investigational drug. The type and severity of adverse events, date, and the investigator’s opinion regarding any associations between the drug and the adverse events were recorded.

### Statistical analysis

Using data from previous studies [23, 24], we calculated that a minimum sample of 53 participants per group would be required for the current study, using a non-inferior design, based on an alpha of 0.025, power of 0.80, a minimal clinically important difference (margin of non-inferiority) of 0.40, and a follow-up loss rate of 20%.

All efficacy data were analyzed based on the full analysis set and the per protocol set. The supplementary and rescue drug usage data were analyzed based on the safety analysis, full analysis, and per protocol sets.

Participants’ baseline characteristics and drug compliance were compared using the Chi-square test, Fisher’s exact test, independent two-sample t-test, or Wilcoxon rank sum test according to the normal distribution of the study population. LDQ was evaluated from “No” to “Very severe” of symptom level for eight gastrointestinal symptoms. Each symptom level was converted as follows: 0: “No”, 1: “Very mild”, 2: “Mild”, 3: “Moderate”, 4: “Severe”, 5: “Very severe”. The LDQ score was calculated as the total sum of eight symptoms and used for the analysis. The baseline-adjusted LDQ score was defined as the difference between the LDQ scores at the initial and final visits. The baseline-adjusted LDQ scores at 12 weeks after treatment were compared between the study group and the control group using a non-inferiority test (one-sided 95% confidence interval (CI), the margin of non-inferiority 0.40). The alpha level of significance for the non-inferiority test was set at 0.025. Secondary outcome measures, including the baseline-adjusted GSRS score, VAS score, EQ-5D scale, EQ VAS, use of the supplementary drug, and use of the rescue drug were assessed for superiority between the two groups. According to the normal distribution of the study population, an independent two-sample t-test or Wilcoxon rank sum test was performed to examine the secondary outcome measures between the two groups. The alpha level of significance for the other statistical test

was set at 0.05. All statistical analyses were performed using SAS 9.3(SAS Institute, Cary, NC, USA).

## Results

### Characteristics of the subjects

Participants were enrolled between March 2015 and April 2017. A total of 112 patients were assessed for eligibility for the study. Finally, 105 patients met the inclusion criteria and were randomly assigned to one of the study groups (52 and 53 patients in the NAXOZOL and celecoxib group, respectively). Fig 1 shows the number of subjects involved in the current trial, from the eligibility assessment through the 12-week follow-up. At the 12-week assessment, complete data were available for 61 of the 105 participants (58.0%), which was different from our initial expectation of the rate of follow-up loss. However, the number of complete enrolled participants was sufficient to analyze the non-inferiority between the groups with the LDQ scores as a primary outcome.

There was no difference in participant baseline characteristics between the two groups (Table 1). The mean ages of patients in the NAXOZOL and celecoxib groups were  $65.44 \pm 8.49$  and  $66.09 \pm 7.16$  years, respectively. There was no statistically significant difference between the two groups in sex, height, weight, smoking history, status of alcohol drinking, and the pathophysiology and sites of osteoarthritis. The most common etiology of osteoarthritis was primary or idiopathic and the most common affected site was the spine in the both groups.

The rate of missing data and drug compliance were similar between the groups throughout the follow-up period based on an evaluation of the safety analysis, full analysis, and per protocol sets (Table 2).

### Efficacy

The baseline-adjusted LDQ score (primary outcome) at 12 weeks after treatment in the NAXOZOL group was not inferior to those in the celecoxib groups (Tables 3 and 4). At 12 weeks after treatment, the 95% CI of the difference was within the predetermined margin of non-inferiority (LDQ score, 0.40) based on an evaluation of the full analysis set (0.30, Table 3) and the per protocol set (0.11, Table 4). The overall change in baseline-adjusted GSR scores, VAS scores, the EQ-5D, and the EQ VAS was not different between the two groups (Tables 3 and 4).

The use of the supplementary drug was not different between the two groups (Table 5).

The most significant parameters for the use of the rescue drug were not different between the two groups (Table 6). However, the days to use the rescue drug were longer in the celecoxib group than in the NAXOZOL group.

A total of 8 and 9 cases of drug-related adverse events occurred in the NAXOZOL and celecoxib groups, respectively (Table 7). There was no statistical difference between the two groups ( $p = 0.8243$ , Table 7).

## Discussion

To our knowledge, this is the first study comparing the efficacy of NAXOZOL and celecoxib with respect to gastrointestinal tract protection and pain relief in patients with osteoarthritis.

The baseline-adjusted LDQ scores at 12 weeks after treatment in the NAXOZOL group were not inferior to those in the celecoxib group. The overall change in the baseline-adjusted GSR scores, VAS scores, the EQ-5D, and the EQ VAS, was not different between the two groups. The use of the supplementary drugs and the incidence of drug-related adverse events



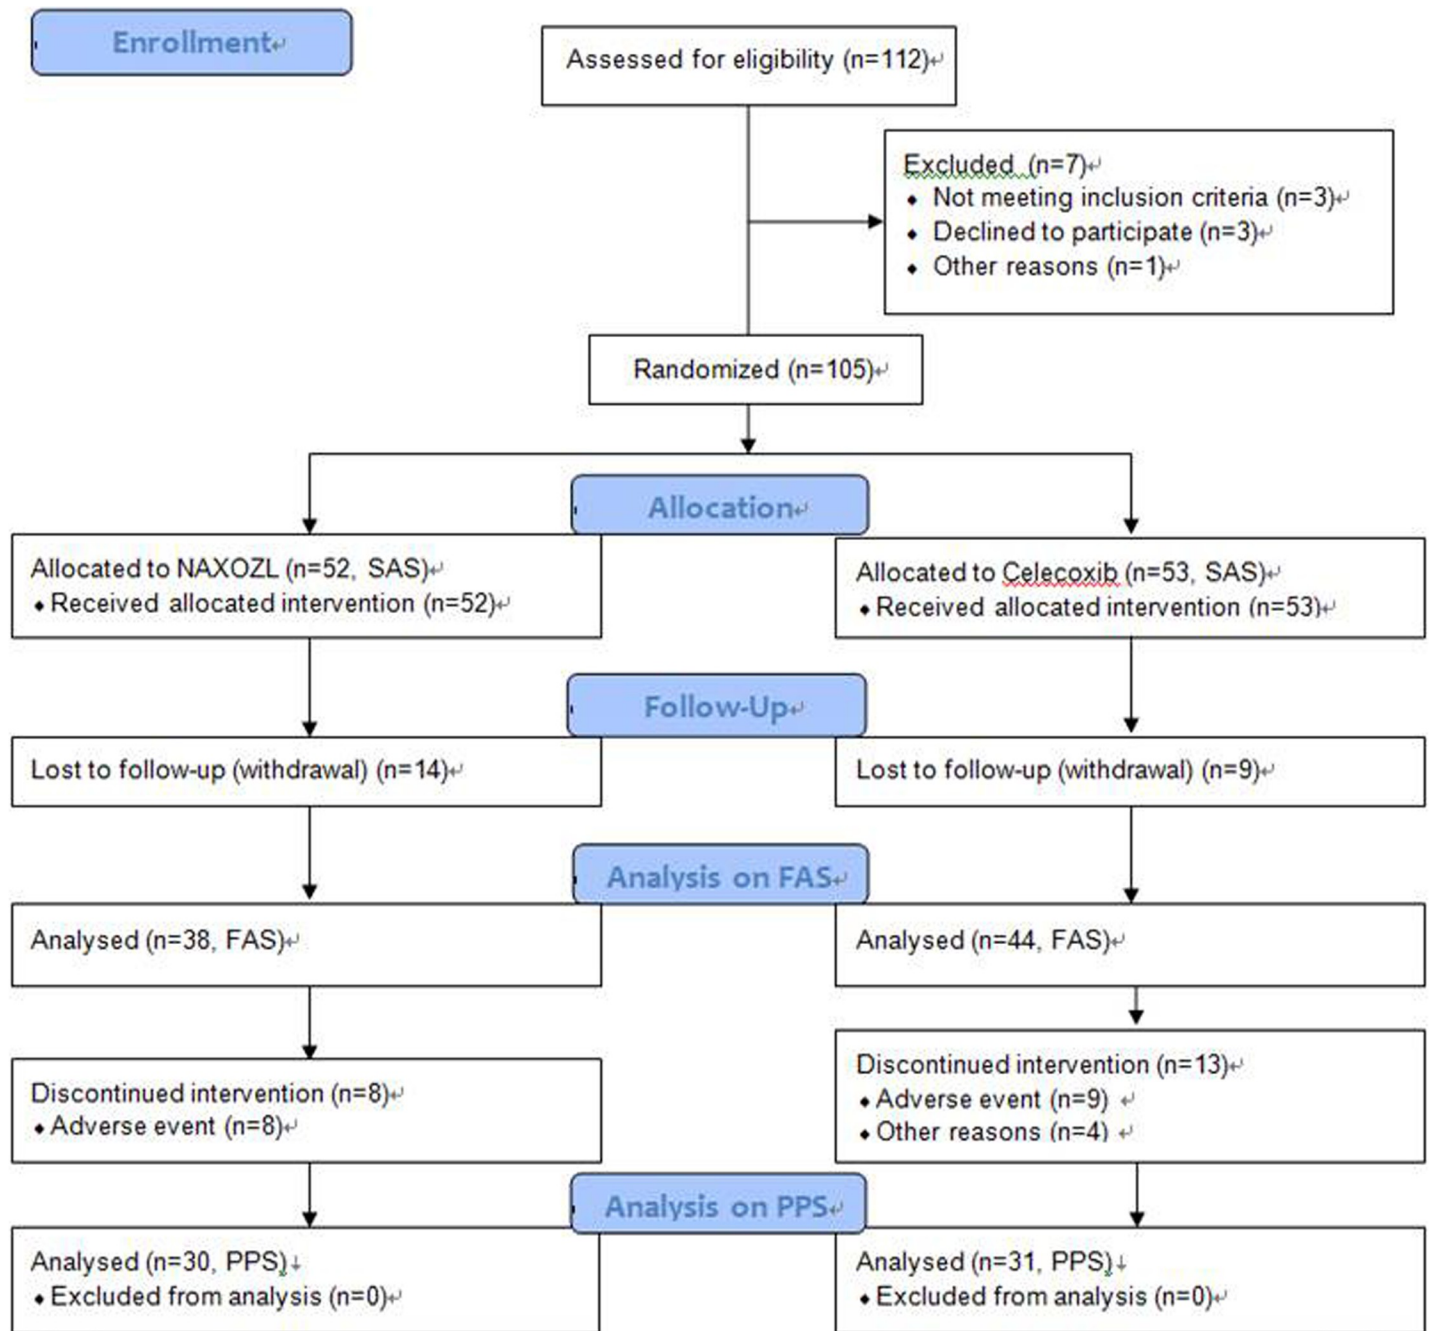

Fig 1. CONSORT flow diagram: enrollment, randomization, assigned interventions, and follow-up of the study participants showing the safety analysis set (SAS), full analysis set (FAS), and per protocol set (PPS).

<https://doi.org/10.1371/journal.pone.0226184.g001>

were not different. However, the days to use the rescue drug were longer in the celecoxib group than in the NAXOZOL group.

Celecoxib can minimize gastrointestinal complications related to the use of NSAIDs [3, 4]. However, there has been controversy over the gastrointestinal tract-related adverse events with the use of celecoxib. Based on a meta-analysis to determine efficacy and safety, the incidence

**Table 1. Baseline characteristics of participants in the study.**

|                                       | NAXOZOL (n = 52) | Celecoxib (n = 53) | P value |
|---------------------------------------|------------------|--------------------|---------|
| Age, years                            | 65.44±8.49       | 66.09±7.16         | 0.6711  |
| Women, n (%)                          | 39 (75.00)       | 35 (66.04)         | 0.3141  |
| Height, cm                            | 157.04±8.24      | 159.00±8.54        | 0.2340  |
| Weight, kg                            | 62.06±9.44       | 63.63±9.87         | 0.4067  |
| Smoker, n (%)                         | 3 (5.77)         | 6 (11.32)          | 0.6486  |
| Alcohol, n (%)                        | 13 (25.00)       | 13 (24.53)         | 1.0000  |
| Medication use, n (%)                 | 29 (55.77)       | 30 (56.60)         | 0.9313  |
| Osteoarthritis pathophysiology, n (%) |                  |                    | 0.9695  |
| Primary or idiopathic                 | 45 (86.54)       | 46 (86.79)         |         |
| Secondary                             | 7 (13.46)        | 7 (13.21)          |         |
| Osteoarthritis site, n (%)            |                  |                    | 0.3694  |
| Shoulder                              | 3 (5.77)         | 3 (5.66)           |         |
| Hand and wrist                        | 0 (0.00)         | 0 (0.00)           |         |
| Elbow                                 | 1 (1.92)         | 0 (0.00)           |         |
| Foot and ankle                        | 1 (1.92)         | 2 (3.77)           |         |
| Knee                                  | 11 (21.15)       | 12 (22.64)         |         |
| Knee and spine                        | 1 (1.92)         | 6 (11.32)          |         |
| Spine                                 | 35 (67.31)       | 30 (56.60)         |         |

Values are mean ± standard deviation.

Smoker: smoking on a regular basis for a period exceeding 12 months

Alcoholic drinker: drinking alcohol on a regular basis for a period exceeding 12 months

<https://doi.org/10.1371/journal.pone.0226184.t001>

of adverse gastrointestinal events in patients with osteoarthritis taking celecoxib is higher than in those given a placebo [25].

VIMOVO is a combination formulation of naproxen and esomeprazole magnesium. Naproxen is a commonly used NSAID that is effective at relieving pain in patients with osteoarthritis or rheumatoid arthritis [26]. In addition, the incidence of myocardial infarction was decreased in patients using naproxen compared with those using other NSAIDs [27]. Esomeprazole magnesium is a commonly used PPI that can control gastrointestinal bleeding and dyspepsia [28]. Patients taking naproxen/esomeprazole magnesium had less upper gastrointestinal complaints compared to those treated with naproxen only [29]. A meta-analysis showed that there was no difference in dyspepsia when comparing naproxen/esomeprazole magnesium with celecoxib as well as with PPI [10]. Based on these data, naproxen/esomeprazole magnesium has been approved for use in Europe. It has been approved for use in the USA to

**Table 2. Drug compliance between the two groups.**

|                     |                     | NAXOZOL     | Celecoxib   | P value |
|---------------------|---------------------|-------------|-------------|---------|
| Safety analysis set | Number              | 52          | 53          |         |
|                     | Drug compliance (%) | 75.49±33.49 | 84.70±25.96 | 0.1482  |
| Full analysis set   | Number              | 38          | 44          |         |
|                     | Drug compliance (%) | 85.72±23.87 | 86.82±23.02 | 0.8347  |
| Per protocol set    | Number              | 30          | 31          |         |
|                     | Drug compliance (%) | 94.53±5.47  | 95.00±5.66  | 0.7415  |

Values are mean ± standard deviation.

<https://doi.org/10.1371/journal.pone.0226184.t002>

**Table 3. Comparison of the effect estimates between the two groups based on the full analysis set.**

|        |            | NAXOZOL (n = 38) | Celecoxib (n = 44) | P value           | 95% CI           |
|--------|------------|------------------|--------------------|-------------------|------------------|
| LDQ    | Initial    | 0.55±1.11        | 0.30±0.82          |                   | -0.1683, 0.6826  |
|        | Final      | 0.34±1.02        | 0.23±0.74          |                   | -0.2740, 0.5037  |
|        | Difference | -0.21±1.23       | -0.07±0.73         | $[-\infty, 0.30]$ | -0.5806, 0.2959  |
| GSRS   | Initial    | 0.24±0.59        | 0.34±1.03          |                   | -0.4818, 0.2736  |
|        | Final      | 0.24±0.59        | 0.16±0.48          |                   | -0.1573, 0.3128  |
|        | Difference | 0.00±0.66        | -0.18±1.06         | 0.9464            | -0.2140, 0.5777  |
| VAS    | Initial    | 59.76±15.16      | 58.73±14.72        |                   | -5.5409, 7.6126  |
|        | Final      | 39.05±24.63      | 38.66±21.76        |                   | -9.7994, 10.5865 |
|        | Difference | -20.71±22.43     | -20.07±20.89       | 0.8936            | -10.1676, 8.8829 |
| EQ-5D  | Initial    | 8.32±1.34        | 8.18±1.21          |                   | -0.4251, 0.6931  |
|        | Final      | 7.34±1.83        | 7.43±1.52          |                   | -0.8261, 0.6467  |
|        | Difference | -0.97±1.40       | -0.75±1.35         | 0.6278            | -0.8296, 0.3822  |
| EQ VAS | Initial    | 61.55±17.41      | 61.34±14.02        |                   | -6.6984, 7.1218  |
|        | Final      | 69.08±19.79      | 63.34±16.24        |                   | -2.1814, 13.6575 |
|        | Difference | 7.53±16.68       | 2.00±14.90         | 0.1170            | -1.4143, 12.4669 |

Values are mean ± standard deviation.

95% CI; 95% confidence interval of differences between NAXOZOL and Celecoxib groups.

Leeds Dyspepsia Questionnaire (LDQ); Gastrointestinal Symptom Rating Scale (GSRS)

Visual Analogue Scale (VAS); European Quality of Life-5 dimensions scale (EQ-5D); European Quality of Life-5 dimensions scale Visual Analogue Scale (EQ VAS)

<https://doi.org/10.1371/journal.pone.0226184.t003>

relieve the symptoms of osteoarthritis and to decrease the risk of ulcers in patients at-risk for developing NSAID-associated gastric ulcers.

**Table 4. Comparison of the effect estimates between the two groups based on the per protocol set.**

|        |            | NAXOZOL (n = 30) | Celecoxib (n = 31) | P value           | 95% CI           |
|--------|------------|------------------|--------------------|-------------------|------------------|
| LDQ    | Initial    | 0.60±1.19        | 0.29±0.69          |                   | -0.1878, 0.8071  |
|        | Final      | 0.17±0.65        | 0.19±0.54          |                   | -0.3327, 0.2789  |
|        | Difference | -0.43±0.86       | -0.10±0.87         | $[-\infty, 0.11]$ | -0.7795, 0.1064  |
| GSRS   | Initial    | 0.23±0.57        | 0.32±1.14          |                   | -0.5522, 0.3737  |
|        | Final      | 0.13±0.43        | 0.16±0.45          |                   | -0.2558, 0.1999  |
|        | Difference | -0.10±0.48       | -0.16±1.21         | 0.4010            | -0.4147, 0.5373  |
| VAS    | Initial    | 58.90±13.81      | 58.65±14.60        |                   | -7.0311, 7.5408  |
|        | Final      | 34.43±21.04      | 31.97±16.44        |                   | -7.1918, 12.1230 |
|        | Difference | -24.47±22.02     | -26.68±17.95       | 0.3262            | -8.0639, 12.4854 |
| EQ-5D  | Initial    | 8.47±1.31        | 8.32±1.08          |                   | -0.4683, 0.7564  |
|        | Final      | 7.23±1.76        | 7.32±1.64          |                   | -0.9595, 0.7810  |
|        | Difference | -1.23±1.38       | -1.00±1.18         | 0.6740            | -0.8917, 0.4250  |
| EQ VAS | Initial    | 62.97±14.19      | 60.29±14.24        |                   | -4.6083, 9.9610  |
|        | Final      | 71.83±16.94      | 63.35±17.14        |                   | -0.2555, 17.2125 |
|        | Difference | 8.87±16.70       | 3.06±15.15         | 0.1602            | -2.3613, 13.9656 |

Values are mean ± standard deviation.

95% CI; 95% confidence interval of differences between NAXOZOL and Celecoxib groups.

Leeds Dyspepsia Questionnaire (LDQ); Gastrointestinal Symptom Rating Scale (GSRS); Visual Analogue Scale (VAS); European Quality of Life-5 dimensions scale (EQ-5D)

European Quality of Life-5 dimensions scale Visual Analogue Scale (EQ VAS)

<https://doi.org/10.1371/journal.pone.0226184.t004>



**Table 5. Comparison of the use of supplementary drug between the two groups.**

| Safety analysis set                | NAXOZOL (n = 52) | Celecoxib (n = 53) | P value |
|------------------------------------|------------------|--------------------|---------|
| Number of patients using, n (%)    | 8 (15.38)        | 14 (26.42)         | 0.1650  |
| Days of use                        | 8.00±10.13       | 15.21±12.59        | 0.1825  |
| Average amount during study period | 0.26±0.37        | 0.19±0.14          | 0.6146  |
| Full analysis set                  | NAXOZOL (n = 38) | Celecoxib (n = 44) | P value |
| Number of patients using, n (%)    | 8 (21.05)        | 13 (29.55)         | 0.3796  |
| Days of use                        | 8.00±10.13       | 15.31±13.10        | 0.1944  |
| Average amount during study period | 0.26±0.37        | 0.18±0.14          | 0.5776  |
| Per protocol set                   | NAXOZOL (n = 30) | Celecoxib (n = 31) | P value |
| Number of patients using, n (%)    | 6 (20.00)        | 11 (35.48)         | 0.1775  |
| Days of use                        | 9.67±11.41       | 17.82±12.68        | 0.2103  |
| Average amount during study period | 0.15±0.15        | 0.21±0.14          | 0.4785  |

Values are mean ± standard deviation.

<https://doi.org/10.1371/journal.pone.0226184.t005>

NAXOZOL is a new combination of naproxen and esomeprazole strontium tetrahydrate. Like other NSAIDs, naproxen predominantly inhibits the activity of cyclooxygenase-2 (COX-2), thereby decreasing the synthesis of prostaglandin and thromboxane from arachidonic acid, exhibiting anti-inflammatory, analgesic, and anti-pyretic effects [26]. Esomeprazole strontium offered an innovative delivery mechanism compared to conventional PPIs [13]. Esomeprazole inhibits H<sup>+</sup>, K<sup>+</sup>-ATPase in gastric parietal cells. It is able to maintain high gastric pH for a longer period of time than other proton pump inhibitors (the maintenance time at pH >4 is 12 hours for other proton pump inhibitors, but is 16.8 hours for esomeprazole) [28]. The FDA has approved esomeprazole strontium for use in adults under the same indications as for esomeprazole magnesium [14]. Pharmacokinetic results showed that the geometric mean ratio and 90% confidence interval of C<sub>max</sub> and AUC<sub>last</sub> were 0.99 (0.94–1.06) and 1.00 (0.98–1.01) for naproxen, and 0.99 (0.82–1.18) and 1.04 (0.91–1.18) for esomeprazole, both of which are within the range that allows for acceptance of biological equivalence (0.8–1.25), showing similar systemic exposure, and, ultimately, the pharmacokinetic equivalence of naproxen and esomeprazole between naproxen/esomeprazole strontium (NAXOZOL) and naproxen /esomeprazole magnesium (VIMOVO) [15]. Based on a clinical study of the pharmacokinetics

**Table 6. Comparison of the use of the rescue drug between the two groups.**

| Safety analysis set                | NAXOZOL (n = 52) | Celecoxib (n = 53) | P value       |
|------------------------------------|------------------|--------------------|---------------|
| Number of patients using, n (%)    | 15 (28.85)       | 17 (32.08)         | 0.7193        |
| Days of use                        | 6.87±6.10        | 15.47±11.63        | <b>0.0134</b> |
| Average amount during study period | 0.12±0.10        | 0.19±0.13          | 0.1026        |
| Full analysis set                  | NAXOZOL (n = 38) | Celecoxib (n = 44) | P value       |
| Number of patients using, n (%)    | 15 (39.47)       | 16 (36.36)         | 0.7721        |
| Days of use                        | 6.87±6.10        | 15.56±12.01        | <b>0.0175</b> |
| Average amount during study period | 0.12±0.10        | 0.18±0.14          | 0.1432        |
| Per protocol set                   | NAXOZOL (n = 30) | Celecoxib (n = 31) | P value       |
| Number of patients using, n (%)    | 13 (43.33)       | 12 (38.71)         | 0.7136        |
| Days of use                        | 7.00±6.47        | 17.75±12.54        | <b>0.0170</b> |
| Average amount during study period | 0.12±0.10        | 0.21±0.14          | 0.0775        |

Values are mean ± standard deviation.

<https://doi.org/10.1371/journal.pone.0226184.t006>

Table 7. Summary of adverse events between the two groups based on the safety analysis set (p value = 0.8243).

|                                                      | NAXOZOL<br>(n = 52)   | Celecoxib<br>(n = 53) | Total<br>(n = 105)     |
|------------------------------------------------------|-----------------------|-----------------------|------------------------|
| <b>Patient number (%) [event number]</b>             | <b>8 (15.38) [14]</b> | <b>9 (16.98) [13]</b> | <b>17 (16.19) [27]</b> |
| Gastrointestinal disorders                           | 3 (5.77) [3]          | 1 (1.89) [1]          | 4 (3.81) [4]           |
| Dyspepsia                                            | 2 (3.85) [2]          | 0 (0.00) [0]          | 2 (1.90) [2]           |
| Diarrhea                                             | 0 (0.00) [0]          | 1 (1.89) [1]          | 1 (0.95) [1]           |
| Glossodynia                                          | 1 (1.92) [1]          | 0 (0.00) [0]          | 1 (0.95) [1]           |
| Infections and infestations                          | 1 (1.92) [1]          | 3 (5.66) [3]          | 4 (3.81) [4]           |
| Nasopharyngitis                                      | 1 (1.92) [1]          | 2 (3.77) [2]          | 3 (2.86) [3]           |
| Bacterial infections NEC                             | 0 (0.00) [0]          | 1 (1.89) [1]          | 1 (0.95) [1]           |
| Skin and subcutaneous tissue disorders               | 0 (0.00) [0]          | 3 (5.66) [3]          | 3 (2.86) [3]           |
| Nail fold inflammation                               | 0 (0.00) [0]          | 1 (1.89) [1]          | 1 (0.95) [1]           |
| Pruritus                                             | 0 (0.00) [0]          | 1 (1.89) [1]          | 1 (0.95) [1]           |
| Skin lesion                                          | 0 (0.00) [0]          | 1 (1.89) [1]          | 1 (0.95) [1]           |
| Investigations                                       | 2 (3.85) [2]          | 0 (0.00) [0]          | 2 (1.90) [2]           |
| Liver function tests increased                       | 1 (1.92) [1]          | 0 (0.00) [0]          | 1 (0.95) [1]           |
| Renal function tests abnormal                        | 1 (1.92) [1]          | 0 (0.00) [0]          | 1 (0.95) [1]           |
| Metabolism and nutrition disorders                   | 0 (0.00) [0]          | 2 (3.77) [2]          | 2 (1.90) [2]           |
| Hypercholesterolemia                                 | 0 (0.00) [0]          | 1 (1.89) [1]          | 1 (0.95) [1]           |
| Hyperlipidemia                                       | 0 (0.00) [0]          | 1 (1.89) [1]          | 1 (0.95) [1]           |
| Musculoskeletal and connective tissue disorders      | 1 (1.92) [1]          | 1 (1.89) [1]          | 2 (1.90) [2]           |
| Arthralgia                                           | 0 (0.00) [0]          | 1 (1.89) [1]          | 1 (0.95) [1]           |
| Back pain                                            | 1 (1.92) [1]          | 0 (0.00) [0]          | 1 (0.95) [1]           |
| Nervous system disorders                             | 0 (0.00) [0]          | 2 (3.77) [2]          | 2 (1.90) [2]           |
| Essential tremor                                     | 0 (0.00) [0]          | 1 (1.89) [1]          | 1 (0.95) [1]           |
| Headache                                             | 0 (0.00) [0]          | 1 (1.89) [1]          | 1 (0.95) [1]           |
| Injury, poisoning and procedural complications       | 1 (1.92) [2]          | 0 (0.00) [0]          | 1 (0.95) [2]           |
| Pathological fracture                                | 1 (1.92) [1]          | 0 (0.00) [0]          | 1 (0.95) [1]           |
| Ulna fracture                                        | 1 (1.92) [1]          | 0 (0.00) [0]          | 1 (0.95) [1]           |
| Surgical and medical procedures                      | 1 (1.92) [2]          | 0 (0.00) [0]          | 1 (0.95) [2]           |
| Bone graft                                           | 1 (1.92) [1]          | 0 (0.00) [0]          | 1 (0.95) [1]           |
| Open reduction of fracture                           | 1 (1.92) [1]          | 0 (0.00) [0]          | 1 (0.95) [1]           |
| Cardiac disorders                                    | 1 (1.92) [1]          | 0 (0.00) [0]          | 1 (0.95) [1]           |
| Angina unstable                                      | 1 (1.92) [1]          | 0 (0.00) [0]          | 1 (0.95) [1]           |
| Eye disorders                                        | 1 (1.92) [1]          | 0 (0.00) [0]          | 1 (0.95) [1]           |
| Lacrimation increased                                | 1 (1.92) [1]          | 0 (0.00) [0]          | 1 (0.95) [1]           |
| General disorders and administration site conditions | 1 (1.92) [1]          | 0 (0.00) [0]          | 1 (0.95) [1]           |
| Suprapubic pain                                      | 1 (1.92) [1]          | 0 (0.00) [0]          | 1 (0.95) [1]           |
| Neoplasms benign, malignant and unspecified          | 0 (0.00) [0]          | 1 (1.89) [1]          | 1 (0.95) [1]           |
| Benign ovarian tumor                                 | 0 (0.00) [0]          | 1 (1.89) [1]          | 1 (0.95) [1]           |

<https://doi.org/10.1371/journal.pone.0226184.t007>

and safety of naproxen/esomeprazole strontium compared to VIMOVO, the pharmacokinetics of naproxen/esomeprazole strontium was comparable to that of VIMOVO [15]. Both drugs were well-tolerated with no safety issues [15]. However, there have been no studies comparing the combination of naproxen and esomeprazole strontium to celecoxib.

As with any study, our investigation has several limitations. First, the final number of study participants was small because of the high rate of losses to follow-up. This might be explained by the fact that the life style in Korean society is different from that in western European

society or American society. However, the rate of missing data was similar between the groups throughout the follow-up period. Additionally, this study is a preliminary study. Second, the patients included in this study had mild dyspepsia. We excluded patients with severe dyspepsia based on exclusion criteria including gastrointestinal ulcers and gastrointestinal bleeding, perforation, penetration, gastric outlet obstruction, gastrointestinal cancer, gastroesophageal reflux, and gastrointestinal infection with *Helicobacter*. Therefore, mean LDQ scores of the study population at the initial visit was between 0.29 and 0.60, and the baseline-adjusted LDQ score after treatment (primary outcome) could not be larger than 0.40 of a minimal clinically important difference. In addition, the standard deviation based on the previous studies to compute the sample size was 0.65 [23, 24], and it is considerably larger in the analysis of the current study. So, the current study was underpowered. In the future, we plan to evaluate the efficacy of NAXOZOL in patients with severe dyspepsia. Despite these limitations, this study, to the best of our knowledge, represents the first study to compare the efficacy of NAXOZOL and celecoxib with respect to gastrointestinal tract protection and pain relief in patients with osteoarthritis.

## Conclusions

NAXOZOL was not inferior to celecoxib in protecting the gastrointestinal tract and alleviating pain in patients with osteoarthritis.

## Supporting information

**S1 Table. Treatment groups and number of subjects per group.**

(DOCX)

**S2 Table. List of Laboratory Safety Tests.**

(DOCX)

**S3 Table. Study schedule.**

(DOCX)

**S1 Fig. The general structure of the study.**

(TIF)

**S2 Fig. Investigator survey.**

(DOCX)

**S3 Fig. Subject survey.**

(DOCX)

**S4 Fig. Subject log.**

(DOCX)

**S1 File. English study protocol.**

(DOCX)

**S2 File. Korean study protocol.**

(DOCX)

**S3 File. CONSORT checklist.**

(DOCX)

## Acknowledgments

**Competing Interests:** This study was supported by a research fund from Hanmi Pharmaceutical Co., Ltd (grant number HM-IITNAX-001). NAXOZOL (Naproxen, Esomeprazole strontium) was provided by Hanmi Pharmaceutical Co., Ltd. The funder provided support in the form of salaries for authors [MSP, CNK, WSL, HJK, SHL, JHK, SJS, SHM]. NAXOZOL is a combination drug of naproxen and esomeprazole strontium ("esomezol" proved in FDA) as a product marketed in only Korea currently. NAXOZOL was patented in 2013 as it contains esomeprazole strontium developed in Hanmi pharmaceutical company. This does not alter our adherence to PLOS ONE policies on sharing data and materials.

**Financial Disclosure:** This study was supported by a research fund from Hanmi Pharmaceutical Co., Ltd (grant number HM-IIT-NAX-001). NAXOZOL (Naproxen, Esomeprazole strontium) was provided by Hanmi Pharmaceutical Co., Ltd. The funder provided support in the form of salaries for authors [MSP, CNK, WSL, HJK, SHL, JHK, SJS, SHM], but did not have any additional role in the study design, data collection, and analysis, decision to publish, or preparation of the manuscript. The funder was not involved in any part of the trial implementation or data analysis. The specific roles of these authors are articulated in the 'author contributions' section.

The authors wish to thank Dr. Young-Hoon Kim (Department of Orthopedic Surgery, Seoul St. Mary's Hospital, Catholic University of Korea College of Medicine), Dr. Ho Seong Lee (Department of Orthopedic Surgery, Asan Medical Center, Ulsan University College of Medicine), Dr. Sung Shik Kang (Department of Orthopaedic Surgery, Busan Bumin Hospital, Affiliation Hospital of Catholic Kwandong University College of Medicine) and Dr. Hyuk-Soo Han (Department of Orthopedic Surgery, Seoul National University College of Medicine) for their assistance in obtaining the research data.

## Author Contributions

**Conceptualization:** Moon Soo Park, Chang-Nam Kang, Woo-Suk Lee, Ho-Joong Kim, Sahnghoon Lee, Jin Hwan Kim, Sang-Jin Shin, Seong-Hwan Moon.

**Data curation:** Moon Soo Park, Chang-Nam Kang, Woo-Suk Lee, Ho-Joong Kim, Sahnghoon Lee, Jin Hwan Kim, Sang-Jin Shin, Seong-Hwan Moon.

**Formal analysis:** Seong-Hwan Moon.

**Funding acquisition:** Seong-Hwan Moon.

**Investigation:** Moon Soo Park, Chang-Nam Kang, Woo-Suk Lee, Ho-Joong Kim, Sahnghoon Lee, Jin Hwan Kim, Sang-Jin Shin, Seong-Hwan Moon.

**Methodology:** Seong-Hwan Moon.

**Project administration:** Seong-Hwan Moon.

**Supervision:** Seong-Hwan Moon.

**Validation:** Moon Soo Park, Chang-Nam Kang, Woo-Suk Lee, Ho-Joong Kim, Sahnghoon Lee, Jin Hwan Kim, Sang-Jin Shin, Seong-Hwan Moon.

**Writing – original draft:** Moon Soo Park.

**Writing – review & editing:** Moon Soo Park.

## References

1. Patrignani P, Tacconelli S, Bruno A, Sostres C, Lanas A. Managing the adverse effects of nonsteroidal anti-inflammatory drugs. *Expert Rev Clin Pharmacol*. 2011; 4(5):605–21. Epub 2011/11/26. <https://doi.org/10.1586/ecp.11.36> PMID: 22114888.
2. Lanas A, Hirschowitz BI. Toxicity of NSAIDs in the stomach and duodenum. *Eur J Gastroenterol Hepatol*. 1999; 11(4):375–81. Epub 1999/05/13. <https://doi.org/10.1097/00042737-199904000-00003> PMID: 10321752.
3. Watson DJ, Harper SE, Zhao PL, Quan H, Bolognese JA, Simon TJ. Gastrointestinal tolerability of the selective cyclooxygenase-2 (COX-2) inhibitor rofecoxib compared with nonselective COX-1 and COX-2 inhibitors in osteoarthritis. *Arch Intern Med*. 2000; 160(19):2998–3003. Epub 2000/10/21. ioi90757 [pii]. <https://doi.org/10.1001/archinte.160.19.2998> PMID: 11041909.
4. Moore RA, Derry S, Makinson GT, McQuay HJ. Tolerability and adverse events in clinical trials of celecoxib in osteoarthritis and rheumatoid arthritis: systematic review and meta-analysis of information from company clinical trial reports. *Arthritis Res Ther*. 2005; 7(3):R644–65. Epub 2005/05/19. ar1704 [pii] <https://doi.org/10.1186/ar1704> PMID: 15899051; PubMed Central PMCID: PMC1174947.
5. Hawkey CJ, Jones RH, Yeomans ND, Scheiman JM, Talley NJ, Goldstein JL, et al. Efficacy of esomeprazole for resolution of symptoms of heartburn and acid regurgitation in continuous users of non-steroidal anti-inflammatory drugs. *Aliment Pharmacol Ther*. 2007; 25(7):813–21. Epub 2007/03/22. APT3210 [pii] <https://doi.org/10.1111/j.1365-2036.2006.03210.x> PMID: 17373920.
6. Scheiman JM, Yeomans ND, Talley NJ, Vakil N, Chan FK, Tulassay Z, et al. Prevention of ulcers by esomeprazole in at-risk patients using non-selective NSAIDs and COX-2 inhibitors. *Am J Gastroenterol*. 2006; 101(4):701–10. Epub 2006/02/24. AJG499 [pii] <https://doi.org/10.1111/j.1572-0241.2006.00499.x> PMID: 16494585.
7. Lanza FL, Chan FK, Quigley EM. Guidelines for prevention of NSAID-related ulcer complications. *Am J Gastroenterol*. 2009; 104(3):728–38. Epub 2009/02/26. <https://doi.org/10.1038/ajg.2009.115> [pii]. PMID: 19240698.
8. Miner P Jr., Plachetka J, Orlemans E, Fort JG, Sostek M. Clinical trial: evaluation of gastric acid suppression with three doses of immediate-release esomeprazole in the fixed-dose combination of PN 400 (naproxen/esomeprazole magnesium) compared with naproxen 500 mg and enteric-coated esomeprazole 20 mg: a randomized, open-label, Phase I study in healthy volunteers. *Aliment Pharmacol Ther*. 2010; 32(3):414–24. <https://doi.org/10.1111/j.1365-2036.2010.04361.x> PMID: 20491746.
9. Cryer BL, Sostek MB, Fort JG, Svensson O, Hwang C, Hochberg MC. A fixed-dose combination of naproxen and esomeprazole magnesium has comparable upper gastrointestinal tolerability to celecoxib in patients with osteoarthritis of the knee: results from two randomized, parallel-group, placebo-controlled trials. *Ann Med*. 2011; 43(8):594–605. <https://doi.org/10.3109/07853890.2011.625971> PMID: 22017620.
10. Datto C, Hellmund R, Siddiqui MK. Efficacy and tolerability of naproxen/esomeprazole magnesium tablets compared with non-specific NSAIDs and COX-2 inhibitors: a systematic review and network analyses. *Open Access Rheumatol*. 2013; 5:1–19. <https://doi.org/10.2147/OARRR.S41420> PMID: 27790020; PubMed Central PMCID: PMC5074787.
11. Goldstein JL, Hochberg MC, Fort JG, Zhang Y, Hwang C, Sostek M. Clinical trial: the incidence of NSAID-associated endoscopic gastric ulcers in patients treated with PN 400 (naproxen plus esomeprazole magnesium) vs. enteric-coated naproxen alone. *Aliment Pharmacol Ther*. 2010; 32(3):401–13. <https://doi.org/10.1111/j.1365-2036.2010.04378.x> PMID: 20497139.
12. Sostek MB, Fort JG, Estborn L, Vikman K. Long-term safety of naproxen and esomeprazole magnesium fixed-dose combination: phase III study in patients at risk for NSAID-associated gastric ulcers. *Curr Med Res Opin*. 2011; 27(4):847–54. Epub 2011/02/16. <https://doi.org/10.1185/03007995.2011.555756> PMID: 21319944.
13. Parekh PJ, Oldfield EC, Johnson DA. Treatment of gastroesophageal reflux disease: two new oral formulations dexlansoprazole MR and esomezol (esomeprazole strontium). *Expert Opin Pharmacother*. 2014; 15(9):1215–22. <https://doi.org/10.1517/14656566.2014.911841> PMID: 24749891.
14. In brief: Esomeprazole strontium. *Med Lett Drugs Ther*. 2014; 56(1447):64. PMID: 25046421.
15. Choi Y, Han H, Shin D, Lim KS, Yu KS. Comparison of the pharmacokinetics and tolerability of HCP1004 (a fixed-dose combination of naproxen and esomeprazole strontium) and VIMOVO(R) (a marketed fixed-dose combination of naproxen and esomeprazole magnesium) in healthy volunteers. *Drug Des Devel Ther*. 2015; 9:4127–35. <https://doi.org/10.2147/DDDT.S86725> PMID: 26257511; PubMed Central PMCID: PMC4527374.
16. Holtmann G, Talley NJ, Liebrechts T, Adam B, Parow C. A placebo-controlled trial of itopride in functional dyspepsia. *N Engl J Med*. 2006; 354(8):832–40. Epub 2006/02/24. 354/8/832 [pii] <https://doi.org/10.1056/NEJMoa052639> PMID: 16495395.

17. Rabeneck L, Goldstein JL, Vu A, Mayne TJ, Rublee DA. Valdecoxib is associated with improved dyspepsia-related health compared with nonspecific NSAIDs in patients with osteoarthritis or rheumatoid arthritis. *Am J Gastroenterol*. 2005; 100(5):1043–50. Epub 2005/04/22. AJG40701 [pii] <https://doi.org/10.1111/j.1572-0241.2005.40701.x> PMID: 15842577.
18. Zhang W, Doherty M, Peat G, Bierma-Zeinstra MA, Arden NK, Bresnihan B, et al. EULAR evidence-based recommendations for the diagnosis of knee osteoarthritis. *Ann Rheum Dis*. 2010; 69(3):483–9. <https://doi.org/10.1136/ard.2009.113100> PMID: 19762361.
19. Moayyedi P, Duffett S, Braunholtz D, Mason S, Richards ID, Dowell AC, et al. The Leeds Dyspepsia Questionnaire: a valid tool for measuring the presence and severity of dyspepsia. *Aliment Pharmacol Ther*. 1998; 12(12):1257–62. Epub 1999/01/09. <https://doi.org/10.1046/j.1365-2036.1998.00404.x> PMID: 9882035.
20. Svedlund J, Sjodin I, Dotevall G. GSRS—a clinical rating scale for gastrointestinal symptoms in patients with irritable bowel syndrome and peptic ulcer disease. *Dig Dis Sci*. 1988; 33(2):129–34. Epub 1988/02/01. <https://doi.org/10.1007/bf01535722> PMID: 3123181.
21. Bolognese JA, Schnitzer TJ, Ehrich EW. Response relationship of VAS and Likert scales in osteoarthritis efficacy measurement. *Osteoarthritis Cartilage*. 2003; 11(7):499–507. Epub 2003/06/20. S1063458403000827 [pii]. [https://doi.org/10.1016/s1063-4584\(03\)00082-7](https://doi.org/10.1016/s1063-4584(03)00082-7) PMID: 12814613.
22. Group TE. EuroQol—a new facility for the measurement of health-related quality of life. *Health Policy*. 1990; 16:199–208. [https://doi.org/10.1016/0168-8510\(90\)90421-9](https://doi.org/10.1016/0168-8510(90)90421-9) PMID: 10109801
23. Hawkey C, Talley NJ, Yeomans ND, Jones R, Sung JJ, Langstrom G, et al. Improvements with esomeprazole in patients with upper gastrointestinal symptoms taking non-steroidal antiinflammatory drugs, including selective COX-2 inhibitors. *Am J Gastroenterol*. 2005; 100(5):1028–36. Epub 2005/04/22. AJG41465 [pii] <https://doi.org/10.1111/j.1572-0241.2005.41465.x> PMID: 15842575.
24. Talley NJ, Fullerton S, Junghard O, Wiklund I. Quality of life in patients with endoscopy-negative heartburn: reliability and sensitivity of disease-specific instruments. *Am J Gastroenterol*. 2001; 96(7):1998–2004. Epub 2001/07/27. S0002-9270(01)02495-9 [pii] <https://doi.org/10.1111/j.1572-0241.2001.03932.x> PMID: 11467624.
25. Xu C, Gu K, Yasen Y, Hou Y. Efficacy and Safety of Celecoxib Therapy in Osteoarthritis: A Meta-Analysis of Randomized Controlled Trials. *Medicine (Baltimore)*. 2016; 95(20):e3585. <https://doi.org/10.1097/MD.0000000000003585> PMID: 27196460; PubMed Central PMCID: PMC4902402.
26. Dugowson CE, Gnanashanmugam P. Nonsteroidal anti-inflammatory drugs. *Phys Med Rehabil Clin N Am*. 2006; 17(2):347–54, vi. Epub 2006/04/18. S1047-9651(05)00117-8 [pii] <https://doi.org/10.1016/j.pmr.2005.12.012> PMID: 16616271.
27. Gunter BR, Butler KA, Wallace RL, Smith SM, Harirforoosh S. Non-steroidal anti-inflammatory drug-induced cardiovascular adverse events: a meta-analysis. *J Clin Pharm Ther*. 2017; 42(1):27–38. <https://doi.org/10.1111/jcpt.12484> PMID: 28019014.
28. Shin JM, Sachs G. Pharmacology of proton pump inhibitors. *Curr Gastroenterol Rep*. 2008; 10(6):528–34. Epub 2008/11/14. <https://doi.org/10.1007/s11894-008-0098-4> PMID: 19006606; PubMed Central PMCID: PMC2855237.
29. Roberts DN, Miner PB. Safety aspects and rational use of a naproxen + esomeprazole combination in the treatment of rheumatoid disease. *Drug Healthc Patient Saf*. 2011; 3:1–8. Epub 2011/07/15. <https://doi.org/10.2147/DHPS.S7329> [pii]. PMID: 21753897; PubMed Central PMCID: PMC3132859.
